# Supplementary material for: Curcumin Enhances Radiosensitization of Nasopharyngeal Carcinoma via Mediating Regulation of Tumor Stem-like Cells by a CircRNA Network
Source: PubMed Central journal article supplement (PMC7052922; doi:10.7150/jca.39511), 2020-02-10
Supplement: jcav11p2360s1.pdf [file jcav11p2360s1.pdf]

---

## Supplementary material

### Supplementary Table S1 Primers used for qRT-PCR.

|                      |  |                        |  |  |  |
|----------------------|--|------------------------|--|--|--|
| mRNA                 |  |                        |  |  |  |
| IGF1R-F              |  | GAGAGGAGCAGCTAGAAGGG   |  |  |  |
| IGF1R-R              |  | CCCTTTAGTCCCCGTCCTT    |  |  |  |
|                      |  |                        |  |  |  |
| FGFR1-F              |  | ATCGAGGTGAATGGGAGCAA   |  |  |  |
| FGFR1-R              |  | CTCTCCAGGGCTTCCAGAA    |  |  |  |
|                      |  |                        |  |  |  |
| MAPK1-F              |  | GTGACCTCAAGCCTTCCAAC   |  |  |  |
| MAPK1-R              |  | AGAATGCAGCCTACAGACCA   |  |  |  |
|                      |  |                        |  |  |  |
| MAPK3-F              |  | AAGATCAGCCCCTTGAACA    |  |  |  |
| MAPK3-R              |  | CCATCAGGTCCTGCACAATG   |  |  |  |
|                      |  |                        |  |  |  |
| SMAD2-F              |  | CTTTGTGCAGAGCCCCAATT   |  |  |  |
| SMAD2-R              |  | CTTGTTACCGTCTGCCTTCG   |  |  |  |
|                      |  |                        |  |  |  |
| CTNNB1-F             |  | CTTACCCACCATCCCACT     |  |  |  |
| CTNNB1-R             |  | CCTCCACAAATTGCTGCTGT   |  |  |  |
|                      |  |                        |  |  |  |
| GAPDH-F              |  | ATCATCAGCAATGCCTCCTG   |  |  |  |
| GAPDH-R              |  | ATGGACTGTGGTCATGAGTC   |  |  |  |
|                      |  |                        |  |  |  |
| circRNA              |  |                        |  |  |  |
| hsa_circRNA_102115-F |  | ATCGAGAATTGTTGCAGGGC   |  |  |  |
| hsa_circRNA_102115-R |  | CGTCAGCCGCTCATGG       |  |  |  |
|                      |  |                        |  |  |  |
| hsa_circRNA_104057-F |  | AGAGGCCTTACAAGTGCCT    |  |  |  |
| hsa_circRNA_104057-R |  | CCTCTTTCGTTTCCTGTGCA   |  |  |  |
|                      |  |                        |  |  |  |
| hsa_circRNA_103572-F |  | TGCAGGCGAAATGTGGAAAA   |  |  |  |
| hsa_circRNA_103572-R |  | AGGTCTGTCATCACTCTGAGG  |  |  |  |
|                      |  |                        |  |  |  |
| hsa_circRNA_004868-F |  | GAGTGAGTGGCTTAACAGTG   |  |  |  |
| hsa_circRNA_004868-R |  | GTACCAACCTGTTCCAG      |  |  |  |
|                      |  |                        |  |  |  |
| hsa_circRNA_100912-F |  | TGCTGCAACAATGGATTCACT  |  |  |  |
| hsa_circRNA_100912-R |  | ATTAAGCCAGCTGAAGGGT    |  |  |  |
|                      |  |                        |  |  |  |
| hsa_circRNA_102857-F |  | GCTACATCCAGGAGAGAATGC  |  |  |  |
| hsa_circRNA_102857-R |  | AAGCCAAATCACCTGTCTGC   |  |  |  |
|                      |  |                        |  |  |  |
| hsa_circRNA_402801-F |  | GCGTGA ACTATAAGGAGCCC  |  |  |  |
| hsa_circRNA_402801-R |  | TGAGTTTCAGGTGGTGTAGTTT |  |  |  |

| miRNA           |       |                                                   |  |  |  |  |  |
|-----------------|-------|---------------------------------------------------|--|--|--|--|--|
| hsa-miR-335-3p  | RV-MR | GTCGTACCAGTGCAGGGTCCGAGGTATTCGCACTGGATACGACGGTCAG |  |  |  |  |  |
|                 | QPF   | GGCCTTTTTCATTATTGCTCC                             |  |  |  |  |  |
|                 | QPR   | GTGCAGGGTCCGAGGTATT                               |  |  |  |  |  |
| hsa-miR-19a-3p  | RV-MR | GTCGTACCAGTGCAGGGTCCGAGGTATTCGCACTGGATACGACTCAGTT |  |  |  |  |  |
|                 | QPF   | CGTGTGCAAATCTATGCAAAA                             |  |  |  |  |  |
|                 | QPR   | GTGCAGGGTCCGAGGTATT                               |  |  |  |  |  |
| hsa-miR-544a    | RV-MR | GTCGTACCAGTGCAGGGTCCGAGGTATTCGCACTGGATACGACGAACTT |  |  |  |  |  |
|                 | QPF   | GGGATTCTGCATTTTTAGCAAG                            |  |  |  |  |  |
|                 | QPR   | GTGCAGGGTCCGAGGTATT                               |  |  |  |  |  |
| hsa-miR-4422    | RV-MR | GTCGTACCAGTGCAGGGTCCGAGGTATTCGCACTGGATACGACTGGGTA |  |  |  |  |  |
|                 | QPF   | CAAAAGCATCAGGAAGTACCC                             |  |  |  |  |  |
|                 | QPR   | GTGCAGGGTCCGAGGTATT                               |  |  |  |  |  |
| hsa-miR-9-5p    | RV-MR | GTCGTACCAGTGCAGGGTCCGAGGTATTCGCACTGGATACGACTCATA  |  |  |  |  |  |
|                 | QPF   | CCCGTCTTTGGTTATCTAGCTG                            |  |  |  |  |  |
|                 | QPR   | GTGCAGGGTCCGAGGTATT                               |  |  |  |  |  |
| hsa-miR-450b-5p | RV-MR | GTCGTACCAGTGCAGGGTCCGAGGTATTCGCACTGGATACGACTATTCA |  |  |  |  |  |
|                 | QPF   | CCCTTTTGCAATATGTTCTCG                             |  |  |  |  |  |
|                 | QPR   | GTGCAGGGTCCGAGGTATT                               |  |  |  |  |  |
| hsa-miR-4719    | RV-MR | GTCGTACCAGTGCAGGGTCCGAGGTATTCGCACTGGATACGACCCTGCA |  |  |  |  |  |
|                 | QPF   | CGCGCGTCACAAATCTATAATA                            |  |  |  |  |  |
|                 | QPR   | GTGCAGGGTCCGAGGTATT                               |  |  |  |  |  |
| U6              | RV-MR | CGCTTACGAATTTGCGTGCAT                             |  |  |  |  |  |
|                 | QPF   | CTCGCTTCGGCAGCACA                                 |  |  |  |  |  |
